# Supplementary material for: Latitudinal trends in stable isotope signatures and carbon-concentrating mechanisms of northeast Atlantic rhodoliths
Source: Copernicus journal article supplement (doi:10.5194/bg-15-6139-2018), 2018-10-18
Supplement: Supplementary file 1 [file bg-15-6139-2018-supplement.pdf]

Supplement of Biogeosciences, 15, 6139–6149, 2018  
<https://doi.org/10.5194/bg-15-6139-2018-supplement>  
© Author(s) 2018. This work is distributed under  
the Creative Commons Attribution 4.0 License.

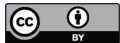

*Supplement of*

## **Latitudinal trends in stable isotope signatures and carbon-concentrating mechanisms of northeast Atlantic rhodoliths**

**Laurie C. Hofmann and Svenja Heesch**

*Correspondence to:* Laurie C. Hofmann (lhofmann@mpi-bremen.de, laurie.c.hofmann@awi.de)

The copyright of individual parts of the supplement might differ from the CC BY 4.0 License.

Table S1. Accession numbers of rhodolith samples sequenced for this manuscript and deposited in ENA/GenBank.

| Site                       | Species name                      | Accession Number                |
|----------------------------|-----------------------------------|---------------------------------|
| Mosselbukta                | <i>Lithothamnion glaciale</i>     | MH697537, MH697538,<br>MH697540 |
| Mosselbukta                | <i>Lithothamnion lemoineae</i>    | MH697539                        |
| Købbe Fjord (Greenland)    | <i>Lithothamnion glaciale</i>     | MH697545                        |
| Købbe Fjord (Greenland)    | <i>Lithothamnion erinaceum</i>    | MH697546                        |
| Akia Peninsula (Greenland) | <i>Lithothamnion glaciale</i>     | MH697544                        |
| Oslo Fjord                 | <i>Lithothamnion glaciale</i>     | nd                              |
| Oslo Fjord                 | <i>Lithothamnion erinaceum</i>    | MH697547                        |
| Mannin Bay, Ireland        | <i>Phymatolithon calcareum</i>    | MH697542                        |
| Mannin Bay, Ireland        | <i>Lithophyllum incrustans</i>    | MH697543                        |
| Carraroe, Ireland          | <i>Phymatolithon lusitanicum</i>  | MH697541                        |
| Brest, France              | <i>Lithothamnion corallioides</i> | nd                              |
| Brest, France              | <i>Lithothamnion</i> sp.          | MH697548                        |
| Las Palmas, Gran Canaria   | <i>Phymatolithon</i> spp.         | nd                              |

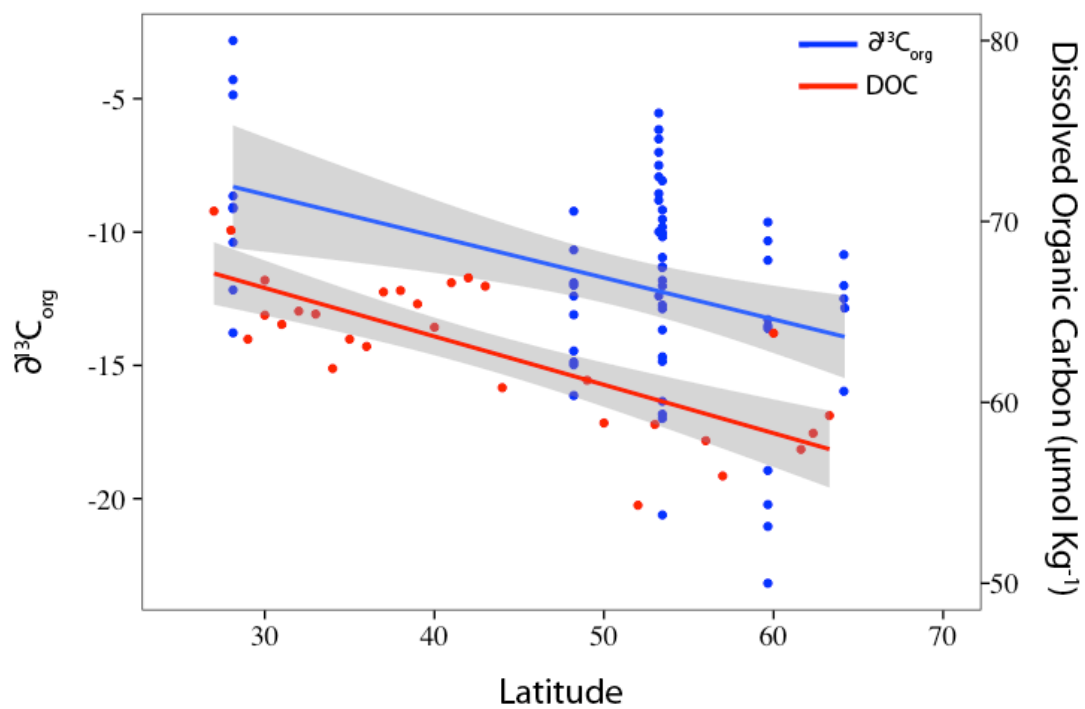

Figure S1. The  $\delta^{13}\text{C}_{\text{org}}$  signatures from our study and surface dissolved organic carbon (DOC) concentrations compiled by GLODAPv2 as a function of Latitude. Both show a decreasing trend with latitude, suggesting there may be an influence of DOC on  $\delta^{13}\text{C}_{\text{org}}$  signatures in the rhodoliths investigated.
